# Supplementary material for: Intratumoral expression of interleukin 23 variants using oncolytic vaccinia virus elicit potent antitumor effects on multiple tumor models via tumor microenvironment modulation
Source: Theranostics. 2021 May 3;11(14):6668–81. doi: 10.7150/thno.56494 (PMC8171085; doi:10.7150/thno.56494)
Supplement: Supplementary file 1 — Supplementary figures. [file thnov11p6668s1.pdf]

# Intratumoral expression of interleukin 23 variants using oncolytic vaccinia virus elicit potent antitumor effects on multiple tumor models via tumor microenvironment modulation

Lingjuan Chen<sup>1-4,#</sup>, Hongqi Chen<sup>3,5#</sup>, Junjie Ye<sup>1-3,6#</sup>, Yan Ge<sup>3,7</sup>, Haiyan Wang<sup>3,7</sup>, Enyong Dai<sup>3,8</sup>, Jinghua Ren<sup>3,4</sup>, Weilin Liu<sup>3,9</sup>, Congrong Ma<sup>3</sup>, Songguang Ju<sup>7</sup>, Z. Sheng Guo<sup>3</sup>, Zuqiang Liu<sup>1-3\*</sup>, and David L. Bartlett<sup>1-3\*</sup>

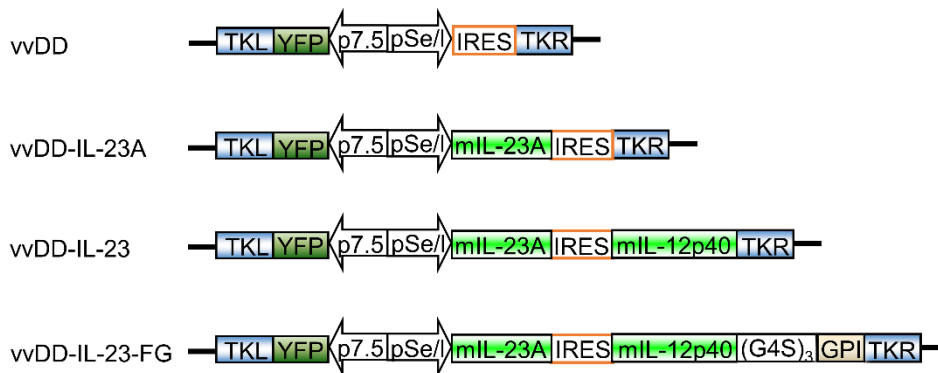

**Figure S1. Schematic diagram of viral IL-23 variants.** vvDD-IL-23A, vvDD-IL-23, and vvDD-IL-23-FG were generated by homologous recombination of murine IL-23 variants into the tk locus of vaccinia viral genome of VSC20, carrying IL-23A, IL-23, and IL-23-flexible linker (G4S)<sub>3</sub>-GPI anchor sequence amplified from human CD16b, respectively.

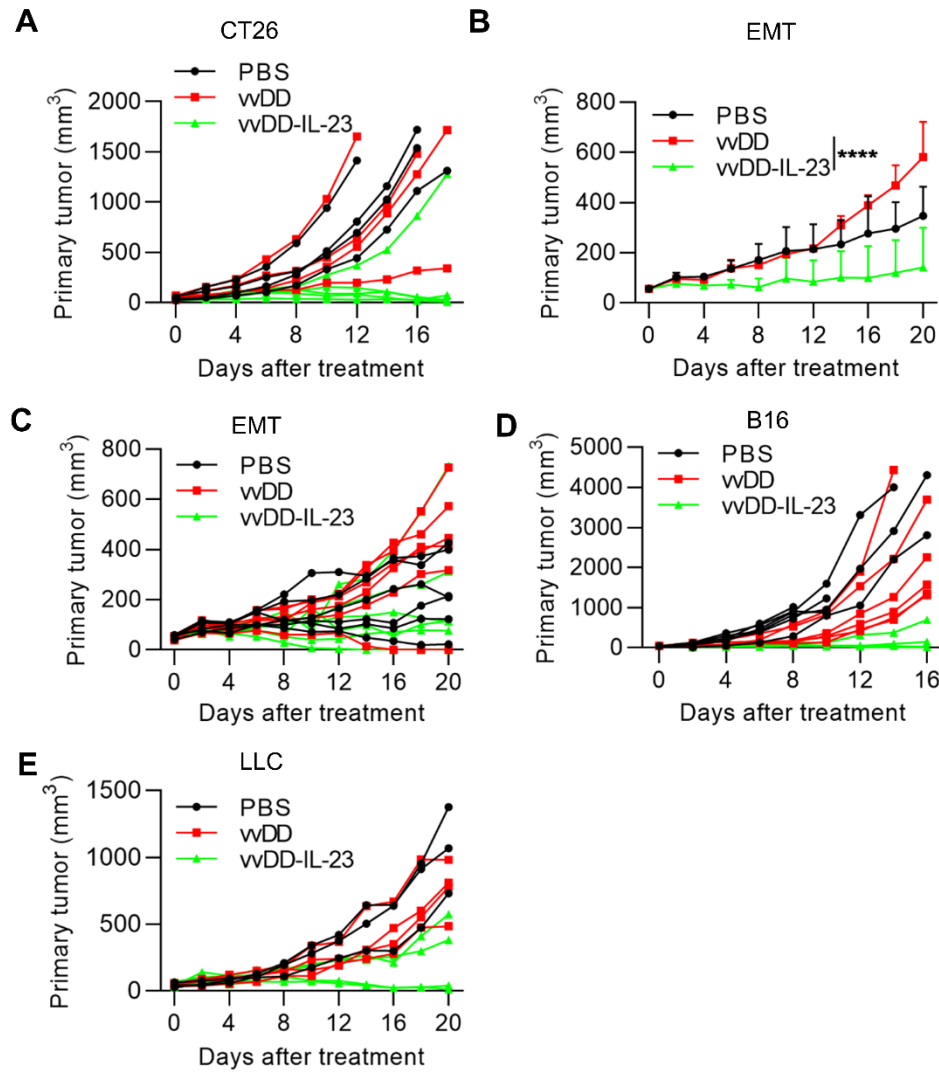

**Figure S2. vvDD-IL-23 treatment elicits potent therapeutic effects in subcutaneous tumor models.** BalB/c mice were s.c. inoculated with  $1 \times 10^6$  CT26 (A) in the right flank or  $1 \times 10^6$  EMT6 (B-C) in the mammary fat pad or B6 mice were s.c. inoculated with  $2 \times 10^5$  B16 (D) or  $5 \times 10^5$  LLC (E) in the right flank. The resulting tumor-bearing mice were i.t. treated with 60  $\mu$ L PBS or  $5 \times 10^7$  PFU/60  $\mu$ L virus per mouse at day 6 (CT26 and EMT6), 10 (B16) or 7 (LLC) after tumor cell inoculation, respectively. Tumor growth curves are shown, respectively. A two-way ANOVA test was used to compare tumor growth curves. \*\*\*\*:  $P < 0.0001$ .

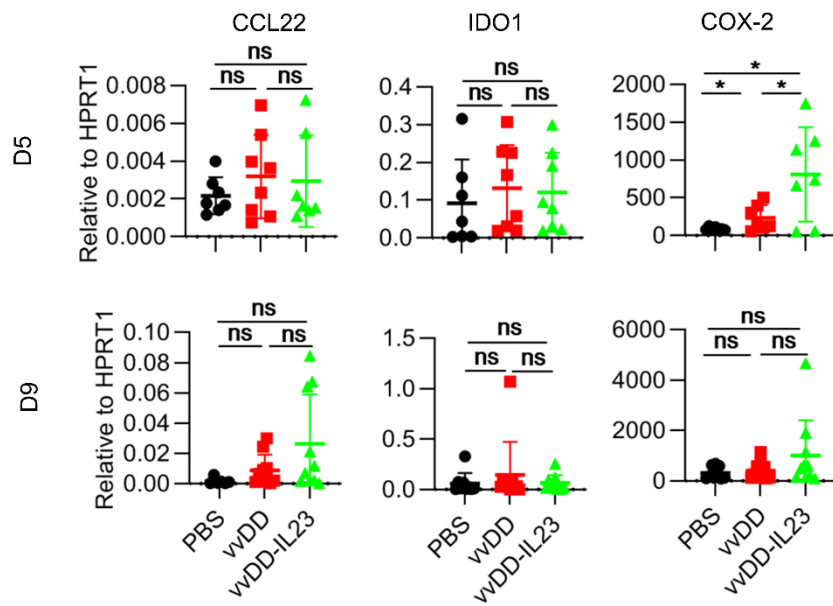

**Figure S3. vvDD-IL-23 treatment transforms TME.** B6 mice were i.p. inoculated with  $5 \times 10^5$  MC38-luc cells and treated with PBS, vvDD, or vvDD-IL-23 at  $2 \times 10^8$  PFU/mouse five days after tumor inoculation. Tumor-bearing mice were sacrificed five or nine days after treatment and primary tumors were collected and analyzed using RT-qPCR to determine the expression of CCL22, IDO1 and COX-2 in the TME. \*:  $P < 0.05$ . ns: not significant.

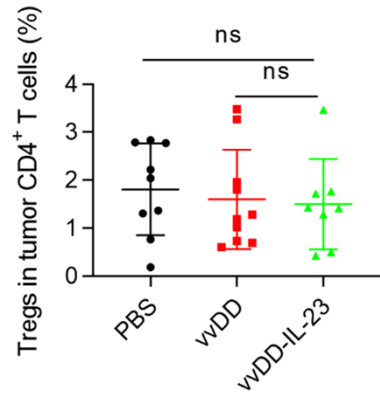

**Figure S4. vvDD-IL-23 treatment does not increase Treg accumulation in TME.** B6 mice were i.p. inoculated with  $5 \times 10^5$  MC38-luc cells and treated with PBS, vvDD, or vvDD-IL-23 at  $2 \times 10^8$  PFU/mouse nine days after tumor inoculation. Tumor-bearing mice were sacrificed five days after treatment and primary tumors were collected and analyzed using flow cytometry to determine CD4<sup>+</sup>Foxp3<sup>+</sup> T cells (Treg). ns: not significant.
